# Supplementary material for: Acute-on-chronic liver failure: Objective admission and support criteria in the intensive care unit
Source: PubMed Central journal article supplement — JHEP Rep. 2019 Mar 18;1(1):44–52. doi: 10.1016/j.jhepr.2019.02.005 (PMC7001553; doi:10.1016/j.jhepr.2019.02.005), 2019-03-18
Supplement: mmc1.pdf [file mmc1.pdf]

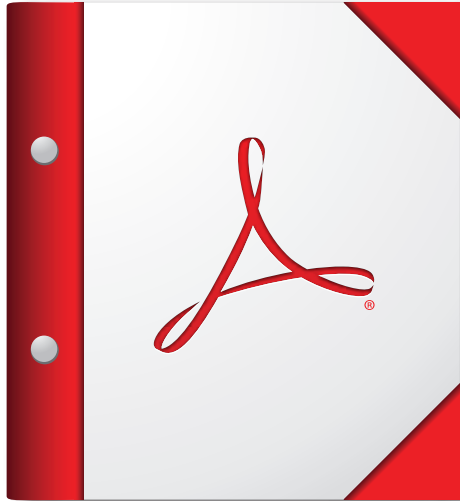

**For the best experience, open this PDF portfolio in  
Acrobat X or Adobe Reader X, or later.**

[Get Adobe Reader Now!](#)
